# Supplementary material for: A Comparative Assessment of Agronomic and Baking Qualities of Modern/Old Varieties and Landraces of Wheat Grown in Calabria (Italy)
Source: MDPI journal article supplement (doi:10.3390/foods11152359), 2022-08-06
Supplement: s1 [file s1]

## SUPPLEMENTARY MATERIALS

**Table S1.** Crumb colour characteristics.

|                 | <i>L</i> <sup>*</sup>     | <i>a</i> <sup>*</sup>     | <i>b</i> <sup>*</sup>     |
|-----------------|---------------------------|---------------------------|---------------------------|
| <b>Genotype</b> | ***                       | ***                       | ***                       |
| Altamira        | 74.6 ± 1.39 <sup>ab</sup> | -1.5 ± 0.20 <sup>cd</sup> | 12.8 ± 1.11 <sup>cd</sup> |
| Bologna         | 73.4 ± 1.85 <sup>bc</sup> | -1.3 ± 0.25 <sup>bc</sup> | 12.3 ± 1.26 <sup>d</sup>  |
| Solehio         | 75.3 ± 0.74 <sup>ab</sup> | -1.8 ± 0.39 <sup>d</sup>  | 14.0 ± 1.48 <sup>bc</sup> |
| PR22R58         | 73.4 ± 1.69 <sup>bc</sup> | -1.6 ± 0.55 <sup>d</sup>  | 15.5 ± 2.58 <sup>b</sup>  |
| Abbondanza      | 75.9 ± 2.25 <sup>a</sup>  | -1.1 ± 0.03 <sup>b</sup>  | 10.0 ± 0.33 <sup>e</sup>  |
| Rosia           | 71.6 ± 0.92 <sup>cd</sup> | -1.1 ± 0.30 <sup>b</sup>  | 10.5 ± 1.39 <sup>e</sup>  |
| Mazzancoio      | 69.4 ± 4.72 <sup>d</sup>  | 0.4 ± 0.03 <sup>a</sup>   | 18.5 ± 1.01 <sup>a</sup>  |
| <b>Location</b> | ***                       | ns                        | ns                        |
| Rombiolo        | 72.6 ± <sup>b</sup>       | -1.1 ± 0.68 <sup>a</sup>  | 13.1 ± 2.81 <sup>a</sup>  |
| Maierato        | 74.1 ± <sup>a</sup>       | -1.2 ± 0.77 <sup>a</sup>  | 13.6 ± 3.35 <sup>a</sup>  |
| <b>Variety</b>  |                           |                           |                           |
| Modern          | 74.1 ± 1.65               | -1.5 ± 0.41               | 13.6 ± 2.07               |
| Old             | 75.9 ± 2.25               | -1.1 ± 0.03               | 10.0 ± 0.33               |
| Landrace        | 70.5 ± 3.51               | -0.4 ± 0.78               | 14.5 ± 4.24               |

*L*<sup>\*</sup>, lightness; *a*<sup>\*</sup>, red to green coordinate; *b*<sup>\*</sup>, yellow to blue coordinate. Mean values are reported for each variable. Different letters in the same column indicate significant differences according to Tukey HSD test at  $p \leq 0.05$ . Different letters in the same column indicate significant differences according to Tukey HSD test at  $p \leq 0.05$ , while \*\*\*, ns, indicate the following levels of significance for each ANOVA model: 0.001, not significant Only the mean values ± standard deviation are shown for the variety component for descriptive purposes.

**Table S2.** Crust colour characteristics.

|                 | <i>L</i> *                | <i>a</i> *                | <i>b</i> *                 |
|-----------------|---------------------------|---------------------------|----------------------------|
| <b>Genotype</b> | ***                       | ***                       | ***                        |
| Altamira        | 42.5 ± 6.57 <sup>ab</sup> | 13.7 ± 3.03 <sup>a</sup>  | 21.6 ± 7.89 <sup>abc</sup> |
| Bologna         | 44.8 ± 6.76 <sup>ab</sup> | 14.2 ± 1.94 <sup>a</sup>  | 23.7 ± 6.93 <sup>ab</sup>  |
| Solehio         | 43.0 ± 4.56 <sup>ab</sup> | 14.9 ± 1.11 <sup>a</sup>  | 22.7 ± 4.78 <sup>ab</sup>  |
| PR22R58         | 44.3 ± 3.93 <sup>ab</sup> | 15.2 ± 1.12 <sup>a</sup>  | 24.1 ± 4.70 <sup>ab</sup>  |
| Abbondanza      | 47.8 ± 2.50 <sup>a</sup>  | 14.9 ± 1.04 <sup>a</sup>  | 27.2 ± 2.47 <sup>a</sup>   |
| Rosia           | 39.3 ± 3.20 <sup>bc</sup> | 13.4 ± 2.32 <sup>ab</sup> | 18.5 ± 5.09 <sup>bc</sup>  |
| Mazzancoio      | 36.6 ± 2.23 <sup>c</sup>  | 11.2 ± 0.76 <sup>b</sup>  | 15.0 ± 1.07 <sup>c</sup>   |
| <b>Location</b> | ns                        | ns                        | ns                         |
| Rombiolo        | 42.5 ± 5.80 <sup>a</sup>  | 13.8 ± 1.88 <sup>a</sup>  | 21.6 ± 6.27 <sup>a</sup>   |
| Maierato        | 42.8 ± 5.46 <sup>a</sup>  | 14.0 ± 2.40 <sup>a</sup>  | 22.0 ± 6.25 <sup>a</sup>   |
| <b>Variety</b>  |                           |                           |                            |
| Modern          | 43.7 ± 5.49               | 14.5 ± 1.99               | 23.0 ± 6.11                |
| Old             | 47.8 ± 2.50               | 14.9 ± 1.04               | 27.2 ± 2.47                |
| Landrace        | 37.9 ± 3.04               | 12.3 ± 2.04               | 16.7 ± 4.00                |

*L*\*, lightness; *a*\*, red to green coordinate; *b*\*, yellow to blue coordinate. Mean values are reported for each variable. Different letters in the same column indicate significant differences according to Tukey HSD test at  $p \leq 0.05$ . Different letters in the same column indicate significant differences according to Tukey HSD test at  $p \leq 0.05$ , while \*\*\*, ns, indicate the following levels of significance for each ANOVA model: 0.001, not significant Only the mean values ± standard deviation are shown for the variety component for descriptive purposes.

**Table S3.** Full list of R packages used for data analysis, manipulation and graphic representation.

| <b>Function</b>                            | <b>R package</b>      | <b>Reference</b> |
|--------------------------------------------|-----------------------|------------------|
| Base function                              | "Base functions of R" | [32]             |
| Data wrangling                             | "dplyr"               | [33]             |
| Multiple paired comparisons                | "multcompView"        | [34]             |
| Correlation computation and representation | "ggstatsplot"         | [35]             |
| PCA                                        | "FactoMineR"          | [36]             |
| PCA                                        | "factoextra"          | [37]             |
| Graphic visualization                      | "ggplot2"             | [38]             |
| Graphic visualization                      | "ggthemes"            | [39]             |
| Graphic visualization                      | "ggsci"               | [40]             |
| Data exportation                           | "rio"                 | [41]             |

**Table S4.** Details on principal components values and variance.

| <b>Principal component</b> | <b>Eigenvalue</b> | <b>% of variance</b> | <b>Cumulative % of variance</b> |
|----------------------------|-------------------|----------------------|---------------------------------|
| 1                          | 9.861363838       | 44.82438108          | 44.82438108                     |
| 2                          | 5.311577534       | 24.14353424          | 68.96791533                     |
| 3                          | 3.150107433       | 14.31867015          | 83.28658548                     |
| 4                          | 0.898434333       | 4.083792424          | 87.3703779                      |
| 5                          | 0.752893903       | 3.422245015          | 90.79262292                     |
| 6                          | 0.466842849       | 2.122012951          | 92.91463587                     |
| 7                          | 0.321507338       | 1.461396992          | 94.37603286                     |
| 8                          | 0.262023458       | 1.19101572           | 95.56704858                     |
| 9                          | 0.213776555       | 0.971711612          | 96.53876019                     |
| 10                         | 0.20371589        | 0.925981319          | 97.46474151                     |
| 11                         | 0.128778232       | 0.585355602          | 98.05009711                     |
| 12                         | 0.122624863       | 0.557385741          | 98.60748285                     |
| 13                         | 0.074637497       | 0.33926135           | 98.9467442                      |
| 14                         | 0.071806507       | 0.326393213          | 99.27313742                     |
| 15                         | 0.0641448         | 0.291567271          | 99.56470469                     |
| 16                         | 0.033322182       | 0.151464463          | 99.71616915                     |
| 17                         | 0.027324791       | 0.124203597          | 99.84037275                     |
| 18                         | 0.015204307       | 0.069110487          | 99.90948323                     |
| 19                         | 0.012063103       | 0.054832286          | 99.96431552                     |
| 20                         | 0.003922335       | 0.017828795          | 99.98214432                     |
| 21                         | 0.00231914        | 0.010541545          | 99.99268586                     |
| 22                         | 0.001609111       | 0.00731414           | 100                             |

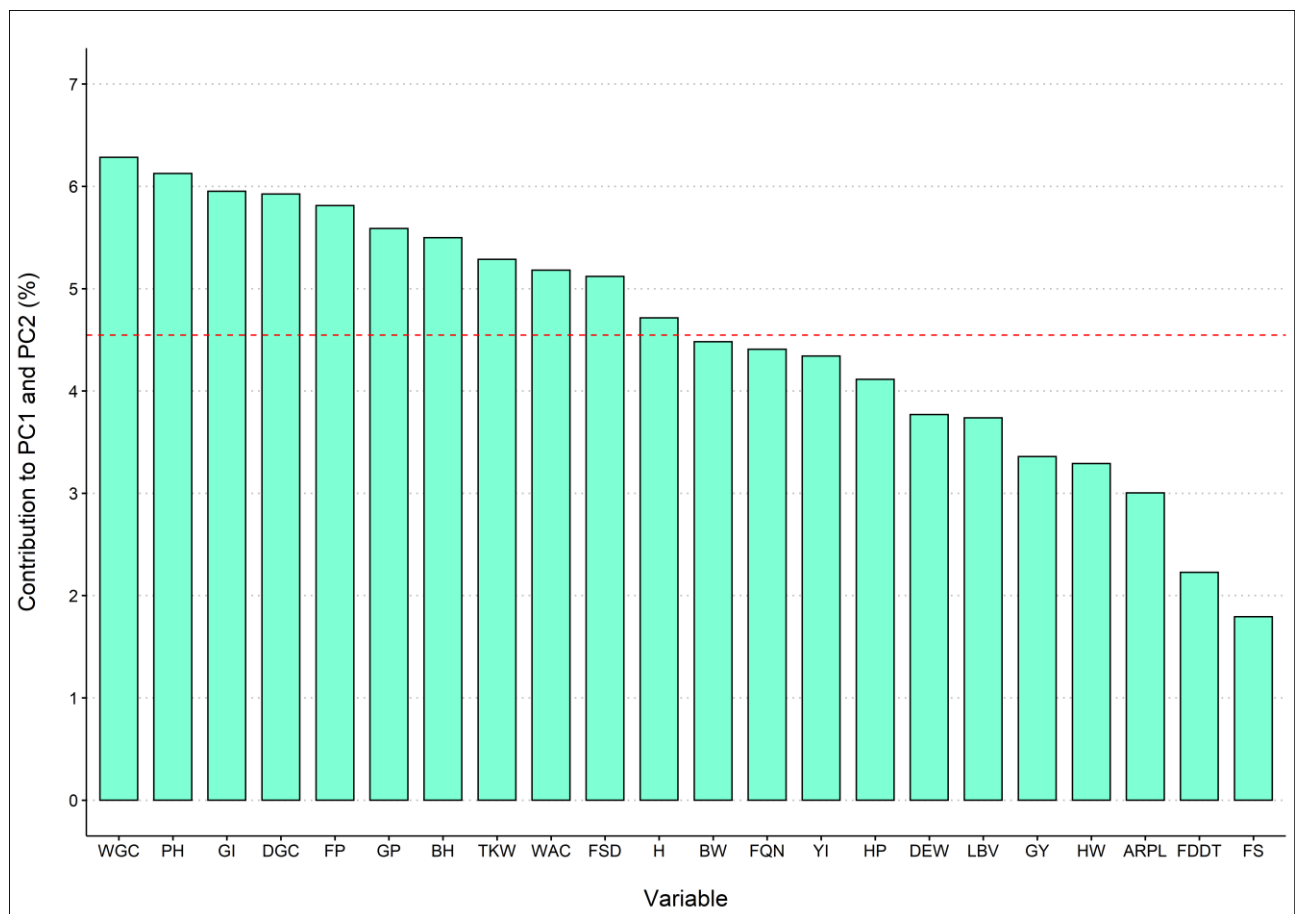

**Figure S1.** Contribution of variables to PC1 and PC2.

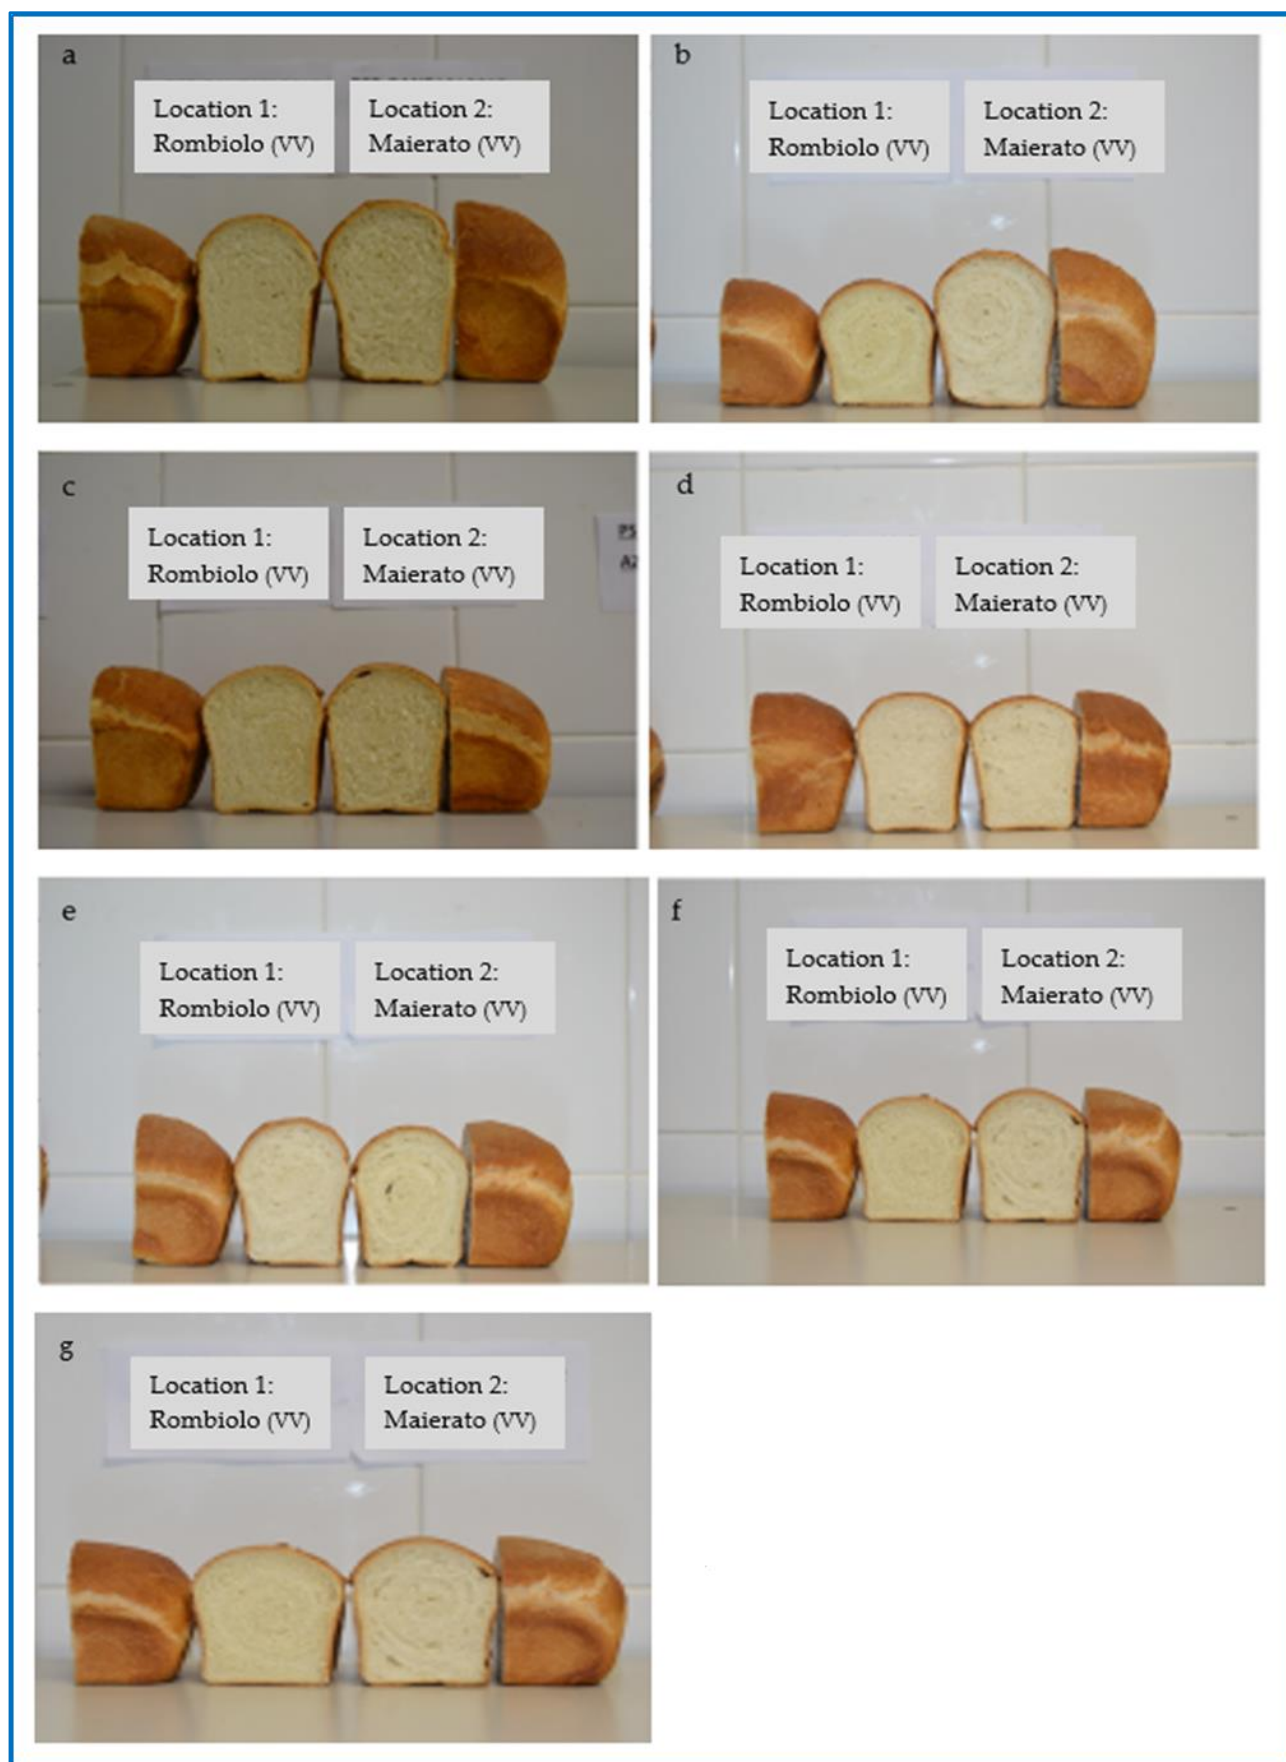

**Figure S2.** Representation of the different breads obtained using the flours from the varieties under study in the two localities. (a) Abbondanza; (b) PR22R58; (c) Altamira; (d) Rosia; (e) Bologna; (f) Solehio; (g) Mazzancoio.
